# Supplementary material for: Probiotics Inhibit Cartilage Damage and Progression of Osteoarthritis in Mice
Source: PubMed Central journal article supplement (PMC9813193; doi:10.1007/s00223-022-01030-7), 2022-10-19
Supplement: 223_2022_1030_MOESM1_ESM.pdf [file 223_2022_1030_MOESM1_ESM.pdf]

# Probiotics inhibit cartilage damage and progression of osteoarthritis in mice

## Supplementary Material

Antonia Sophocleous<sup>1,2</sup>, Asim Azfer<sup>2</sup>, Carmen Huesa<sup>3</sup>, Eleni Stylianou<sup>1</sup>, Stuart H. Ralston<sup>2</sup>

<sup>1</sup>Department of Life Sciences, School of Sciences, European University of Cyprus, Nicosia, Cyprus

<sup>2</sup>Rheumatology and Bone Diseases Unit, Centre for Genomic and Experimental Medicine, MRC Institute of Genetics and Cancer, Western General Hospital, University of Edinburgh, Edinburgh, UK

<sup>3</sup>Institute of Infection, Immunity & Inflammation, College of Medical, Veterinary and Life Sciences, University of Glasgow, Glasgow, UK

**Supplementary Table 1. MicroCT analysis of tibial subchondral bone from DMM-operated and un-operated knee joints of mice subjected to vehicle (n = 10) or probiotics (n = 11) treatment**

| mCT parameter                       | DMM knee    |               | Un-operated knee |               |
|-------------------------------------|-------------|---------------|------------------|---------------|
|                                     | Vehicle     | Probiotics    | Vehicle          | Probiotics    |
| <b>BV/TV (%)</b>                    | 29.4 ± 1.2  | 32.3 ± 0.8    | 27.9 ± 1.1       | 31.6 ± 0.6**  |
| <b>Tb.Th (µm)</b>                   | 56.9 ± 1.6  | 60.5 ± 1.0    | 53.9 ± 1.2       | 58.9 ± 0.9*** |
| <b>Tb.N (1/mm)</b>                  | 5.2 ± 0.1   | 5.3 ± 0.1     | 5.2 ± 0.1        | 5.4 ± 0.1     |
| <b>Tb.Sp (µm)</b>                   | 171.1 ± 3.9 | 168.0 ± 2.8   | 174.3 ± 3.4      | 169.1 ± 2.2   |
| <b>Tb.Pf (1/mm)</b>                 | 10.9 ± 1.0  | 9.3 ± 0.5     | 11.4 ± 0.7       | 9.0 ± 0.5*    |
| <b>Medial plate thickness (µm)</b>  | 93.7 ± 3.9  | 110.4 ± 3.5** | 91.0 ± 3.7       | 101.9 ± 1.9*  |
| <b>Lateral plate thickness (µm)</b> | 86.1 ± 2.3  | 86.8 ± 2.1    | 85.1 ± 4.3       | 98.5 ± 2.2*   |

mCT, microCT; BV/TV, trabecular bone volume; Tb.Th, trabecular thickness; Tb.N, trabecular number; Tb.Sp, trabecular separation; Tb.Pf, trabecular pattern factor. Values are mean ± SEM. \*p < 0.05; \*\* p < 0.01; \*\*\*p < 0.005 vs. vehicle.

**Supplementary Table 2. Cytokine and chemokine concentrations in vehicle- and probiotic-treated groups**

| Cytokine       | Luminex®<br>Region | N    | Vehicle        | Probiotics     |
|----------------|--------------------|------|----------------|----------------|
| G-CSF          | 13                 | 7-12 | 245.5 ± 40.8   | 323.7 ± 58.6   |
| GM-CSF         | 15                 | -    | ND             | ND             |
| IFN $\gamma$   | 19                 | -    | ND             | ND             |
| IL-1 $\alpha$  | 21                 | 8-12 | 1313.7 ± 377.0 | 2418.2 ± 590.8 |
| IL-1 $\beta$   | 25                 | -    | ND             | ND             |
| IL-2           | 26                 | -    | ND             | ND             |
| IL-4           | 28                 | -    | ND             | ND             |
| IL-5           | 30                 | 6-12 | 11.2 ± 1.4     | 13.4 ± 1.7     |
| IL-6           | 34                 | 4-8  | 4.4 ± 0.9      | 6.4 ± 1.4      |
| IL-7           | 36                 | -    | ND             | ND             |
| IL-9           | 38                 | 7-11 | 102.4 ± 15.3   | 102.3 ± 11.4   |
| IL-10          | 43                 | 8-11 | 17.4 ± 2.5     | 10.5 ± 2.2     |
| IL-12 (p40)    | 45                 | 5-9  | 9.1 ± 2.0      | 11.4 ± 2.3     |
| IL12 (p70)     | 47                 | -    | ND             | ND             |
| IL-13          | 52                 | 7-11 | 40.5 ± 2.2     | 42.4 ± 2.2     |
| IL-15          | 54                 | 6-10 | 112.2 ± 17.9   | 96.2 ± 20.7    |
| IL-17          | 56                 | 7-12 | 16.4 ± 2.6     | 13.6 ± 1.4     |
| IP-10          | 57                 | 7-10 | 208.2 ± 26.9   | 211.9 ± 14.3   |
| KC             | 61                 | 7-11 | 123.9 ± 12.5   | 104.4 ± 12.9   |
| MCP-1          | 62                 | 7-12 | 38.5 ± 5.4     | 27.4 ± 4.2     |
| MIP-1 $\alpha$ | 64                 | 7-11 | 82.1 ± 10.1    | 71.7 ± 6.5     |
| MIP-1 $\beta$  | 66                 | 8-11 | 67.6 ± 5.6     | 57.3 ± 5.3     |
| MIP-2          | 73                 | 8-11 | 257.1 ± 25.2   | 296.3 ± 33.3   |
| RANTES         | 75                 | 8-12 | 55.6 ± 5.0     | 45.1 ± 6.5     |
| TNF $\alpha$   | 77                 | -    | ND             | ND             |

G-CSF = Granulocyte colony stimulating factor; GM-CSF = granulocyte-macrophage colony stimulating factor; IL = Interleukin; KC = keratinocyte chemoattractant chemokine; MCP1 = monocyte chemoattractant protein 1; MIP = Macrophage inflammatory protein; RANTES = Regulated on activation normal T cell expressed and secreted; TNF = Tumour necrosis factor. Values are mean ± SEM from 4-12 mice per group and the cytokine concentrations are in pg/ml. N = number of samples assayed; ND = not detectable. There was no significant difference between the groups considering multiple testing.

**Supplementary Figure 1. Joint inflammation scores in the different treatment groups**

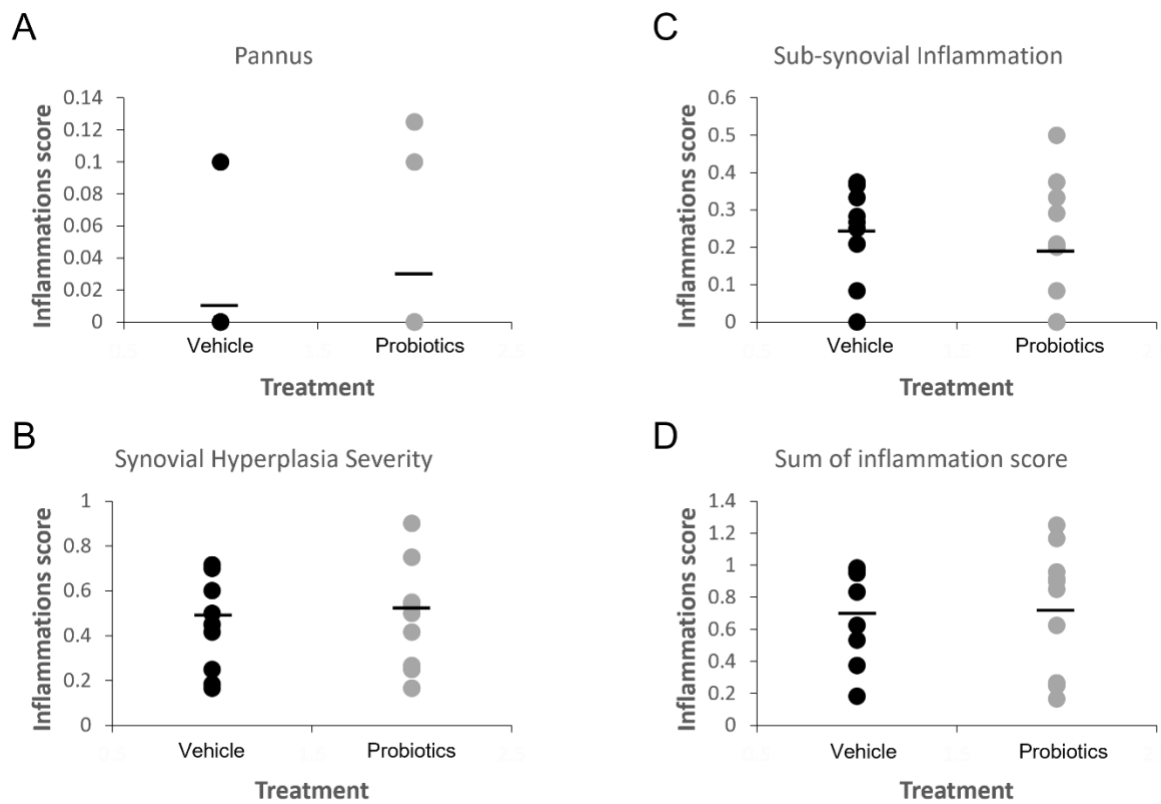

Local inflammation in DMM-operated knee joints of mice subjected to the two different treatment groups, vehicle (n = 10) and probiotics (n = 11). **Panel A.** Pannus formation, defined as fibrous tissue/synovium/ inflammatory cell outgrowth spreading over the surface of the bone and/or cartilage at the joint margins; **Panel B.** Synovial hyperplasia, which includes the score for the maximum hyperplasia seen anywhere along the area assessed; **Panel C.** Sub-synovial inflammation, where the infiltration of inflammatory cells (neutrophils, macrophages and/or lymphocytes) is evaluated; **Panel D.** Sum inflammation score of A, B and C. The horizontal line indicates the mean value for each treatment group.
